# Supplementary material
Source: MDPI journal article supplement (https://www.mdpi.com/1424-2818/10/2/31)
Supplement: s1 [file s1]

lastyear.csv				frlt.csv				kblt.csv						kbnewsm.csv				pdwlt.csv				pdwnewsm.csv			hh.csv
site	lastyrfrl	lastyrpdw	lastyrkbl	site	year	frkm	category	site	year	brood	kblkm	category	subregion	site	year	BROOD	kblkm	site	year	pdwkm	category	site	year	pdwkm	year	frkm	pdwkm	frlt	pdwlt
Bauer2	2014	2013	2014	Bauer2	1992	0	SM	CTHX	1991	1	64.901	PH	Central	Lichtner	2006	1	11.298	Bauer2	1992	0	SM	WoodCFX	2006	5.523	1995	3.143	1.428	1	1
Brock1	2014	2014	2014	Bauer2	1994	0	SM	CTHX	1991	2	91.344	PH	Central	Lichtner	2006	2	19.884	Bauer2	1994	3.551	SM	Lichtner	2006	0	1996	1.812	0.777	1	1
CTHX	2007	2014	2014	Bauer2	1995	1.553	SM	CTHX	1992	1	153.276	PH	Central	WoodCFX	2006	1	8.285	Bauer2	1995	3.107	SM	Lichtner	2007	1.657	1997	0.39	1.041	1	1
Dike17	1996	2012	2014	Bauer2	1996	0	SM	CTHX	1992	2	80.51	PH	Central	WoodCFX	2006	2	41.426	Bauer2	1996	0	SM	WoodCFX	2007	3.551	2001	0.291	0.388	1	1
NBRE	2012	2014	2014	Bauer2	1997	2.486	SM	CTHX	1993	1	38.526	PH	Central	Lichtner	2007	1	18.642	Bauer2	1997	4.519	SM	Lichtner	2008	0	2002		0.32		1
SBRW1	2012	2014	2014	Bauer2	1998	2.26	SM	CTHX	1993	2	11.298	PH	Central	WoodCFX	2007	1	5.523	Bauer2	1998	11.298	SM	WoodCFX	2008	0	2003	0.581	1.626	1	1
SBRW4	2014	2014	2014	Bauer2	1999	0	SM	CTHX	1994	1	41.633	PH	Central	Lichtner	2007	2	24.856	Bauer2	1999	5.326	SM	Lichtner	2009	0	2004	0.836	3.585	1	1
Sand2	2000	2008	2014	Bauer2	2000	1.775	SM	CTHX	1994	2	101.286	PH	Central	WoodCFX	2007	2	12.428	Bauer2	2000	4.143	SM	WoodCFX	2009	12.428	2005	0.694	1.618	1	1
StanM	2012	2013	2014	Bauer2	2001	0	SM	CTHX	1995	1	14.913	PH	Central	WoodCFX	2008	1	1.553	Bauer2	2001	1.775	SM	WoodCFX	2010	7.457	2006	1.021	0.908	1
WCM2	2012	2012	2013	Bauer2	2002	1.381	SM	CTHX	1995	2	27.962	PH	Central	Lichtner	2008	1	18.077	Bauer2	2002	1.381	SM	Lichtner	2010	2.071	2006	0.616	2.054		1
WCM4	2000	2014	2013	Bauer2	2003	0	SM	CTHX	1996	1	15.535	PH	Central	WoodCFX	2008	2	12.428	Bauer2	2003	1.775	SM	Lichtner	2011	0	2007	1.499	0.552	1	1
WCM5/1	2001	2011	2006	Bauer2	2004	1.553	SM	CTHX	1996	2	31.069	PH	Central	Lichtner	2008	2	8.285	Bauer2	2004	7.767	SM	WoodCFX	2011	2.486	2008	0.767	1.074	1	1
WildSpNE	1998	2012	2014	Bauer2	2005	0	SM	CTHX	1997	1	40.39	PH	Central	WoodCFX	2009	1	3.551	Bauer2	2005	5.326	SM	Lichtner	2012	0	2009	1.111	0.303	1
WildSpSE	1998	2003	2005	Bauer2	2006	1.462	SM	CTHX	1997	2	62.139	PH	Central	Lichtner	2009	1	11.298	Bauer2	2006	4.386	SM	WoodCFX	2012	5.523	2009	1.068	0.485		1
XEW	1994	2013	2014	Bauer2	2007	1.243	SM	CTHX	1998	1	67.731	PH	Central	WoodCFX	2009	2	19.332	Bauer2	2007	7.457	SM	WoodCFX	2013	0	2010	2.629	3.824	1	1
XS	2003	2013	2014	Bauer2	2008	1.13	SM	CTHX	1998	2	6.835	PH	Central	Lichtner	2009	2	20.713	Bauer2	2008	2.26	SM	Lichtner	2013	2.071	2011	2.01	4.021	1	1
Bauercut	2010	2014	2014	Bauer2	2009	1.381	SM	CTHX	1999	1	8.078	PH	Central	WoodCFX	2010	1	24.856	Bauer2	2009	4.143	SM	Lichtner	2014	0	2012	4.401	3.797		1
WoodCFX	2010	2012	2014	Bauer2	2010	2.762	SM	CTHX	1999	2	16.777	PH	Central	Lichtner	2010	1	5.736	Bauer2	2010	11.047	SM	WoodCFX	2014	0	2012	7.475	1.531	1
SBRW5	2013	2014	2014	Bauer2	2011	1.243	SM	CTHX	2000	1	14.292	PH	Central	WoodCFX	2010	2	13.809	Bauer2	2011	4.971	SM				2013	0.984	0.656	1	1
Bauer3	2013	2012	2013	Bauer2	2012	1.381	SM	CTHX	2000	2	44.74	PH	Central	Lichtner	2010	2	26.927	Bauer2	2012	5.523	SM				2014	0.981	0.327	1	1
				Bauer2	2013	0	SM	CTHX	2001	1	28.584	PH	Central	Lichtner	2011	1	8.285	Bauer2	2013	2.762	SM
				Bauer2	2014	1.381	SM	CTHX	2001	2	52.818	PH	Central	WoodCFX	2011	1	4.143	Bauer2	2014	0	SM
				Bauer3	1992	0	SM	CTHX	2002	1	8.699	PH	Central	Lichtner	2011	2	26.927	Bauer3	1992	0	SM
				Bauer3	1994	0	SM	CTHX	2002	2	41.633	PH	Central	WoodCFX	2011	2	49.711	Bauer3	1994	4.66	SM
				Bauer3	1995	5.178	SM	CTHX	2003	1	16.156	PH	Central	Lichtner	2012	1	6.214	Bauer3	1995	0	SM
				Bauer3	1996	0	SM	CTHX	2003	2	6.835	PH	Central	WoodCFX	2012	1	2.762	Bauer3	1996	3.551	SM
				Bauer3	1997	0	SM	CTHX	2004	1	0.621	PH	Central	Lichtner	2012	2	14.499	Bauer3	1997	3.551	SM
				Bauer3	1998	0	SM	CTHX	2004	2	2.486	PH	Central	WoodCFX	2012	2	15.535	Bauer3	1998	9.56	SM
				Bauer3	1999	3.107	SM	CTHX	2005	1	1.864	PH	Central	Lichtner	2013	1	6.214	Bauer3	1999	3.551	SM
				Bauer3	2000	1.775	SM	CTHX	2005	2	8.699	PH	Central	WoodCFX	2013	1	0	Bauer3	2000	1.775	SM
				Bauer3	2001	1.775	SM	CTHX	2006	1	6.214	PH	Central	Lichtner	2013	2	8.285	Bauer3	2001	5.326	SM
				Bauer3	2002	0	SM	CTHX	2006	2	12.428	PH	Central	WoodCFX	2013	2	3.107	Bauer3	2002	1.553	SM
				Bauer3	2003	1.657	SM	CTHX	2007	1	3.495	PH	Central	Lichtner	2014	1	2.071	Bauer3	2003	1.553	SM
				Bauer3	2004	1.553	SM	CTHX	2007	2	3.107	PH	Central	WoodCFX	2014	1	6.214	Bauer3	2004	4.66	SM
				Bauer3	2005	1.462	SM	CTHX	2008	1	4.971	PH	Central	Lichtner	2014	2	2.071	Bauer3	2005	0	SM
				Bauer3	2006	1.462	SM	CTHX	2008	2	6.835	PH	Central	WoodCFX	2014	2	9.321	Bauer3	2006	1.462	SM
				Bauer3	2007	0	SM	CTHX	2009	1	3.766	PH	Central					Bauer3	2007	2.924	SM
				Bauer3	2008	1.553	SM	CTHX	2009	2	6.835	PH	Central					Bauer3	2008	2.486	SM
				Bauer3	2009	1.553	SM	CTHX	2010	1	31.691	PH	Central					Bauer3	2009	3.107	SM
				Bauer3	2010	1.381	SM	CTHX	2010	2	55.304	PH	Central					Bauer3	2010	2.762	SM
				Bauer3	2011	1.381	SM	CTHX	2011	1	24.124	PH	Central					Bauer3	2011	6.904	SM
				Bauer3	2012	0	SM	CTHX	2011	2	76.431	PH	Central					Bauer3	2012	1.381	SM
				Bauer3	2013	1.381	SM	CTHX	2012	1	28.584	PH	Central					Bauer3	2013	0	SM
				Bauer3	2014	0	SM	CTHX	2012	2	18.642	PH	Central					Bauer3	2014	0	SM
				Brock1	1992	0	R	CTHX	2013	1	5.592	PH	Central					Brock	1992	0	R
				Brock1	1994	1.243	R	CTHX	2013	2	13.049	PH	Central					Brock	1994	0	R
				Brock1	1995	1.912	R	CTHX	2014	1	1.864	PH	Central					Brock	1995	1.912	R
				Brock1	1996	1.036	R	CTHX	2014	2	22.37	PH	Central					Brock	1996	3.107	R
				Brock1	1997	0	R	Dike17	1991	1	6.835	R	Central					Brock	1997	3.824	R
				Brock1	1998	1.036	R	Dike17	1991	2	128.232	R	Central					Brock	1998	0	R
				Brock1	1999	2.071	R	Dike17	1992	1	286.46	R	Central					Brock	1999	1.036	R
				Brock1	2000	3.107	R	Dike17	1992	2	127.757	R	Central					Brock	2000	0	R
				Brock1	2001	0.731	R	Dike17	1993	1	16.285	R	Central					Brock	2001	2.33	R
				Brock1	2002	0.921	R	Dike17	1993	2	27.245	R	Central					Brock	2002	0.921	R
				Brock1	2003	0.888	R	Dike17	1994	1	81.235	R	Central					Brock	2003	0.888	R
				Brock1	2004	0.857	R	Dike17	1994	2	75.841	R	Central					Brock	2004	3.428	R
				Brock1	2005	1.775	R	Dike17	1995	1	26.871	R	Central					Brock	2005	0.921	R
				Brock1	2006	0.956	R	Dike17	1995	2	48.368	R	Central					Brock	2006	6.692	R
				Brock1	2007	0.71	R	Dike17	1996	1	30.537	R	Central					Brock	2007	2.841	R
				Brock1	2008	0	R	Dike17	1996	2	120.017	R	Central					Brock	2008	1.381	R
				Brock1	2009	1.714	R	Dike17	1997	1	81.284	R	Central					Brock	2009	2.571	R
				Brock1	2010	1.553	R	Dike17	1997	2	82.378	R	Central					Brock	2010	11.599	R
				Brock1	2011	0.829	R	Dike17	1998	1	163.632	R	Central					Brock	2011	4.143	R
				Brock1	2012	1.657	R	Dike17	1998	2	142.032	R	Central					Brock	2012	2.486	R
				Brock1	2013	0.829	R	Dike17	1999	1	11.737	R	Central					Brock	2013	2.486	R
				Brock1	2014	0.829	R	Dike17	1999	2	16.334	R	Central					Brock	2014	1.657	R
				CTHX	1992	0.621	PH	Dike17	2000	1	9.942	R	Central					CTHXall	1991	9.321	PH
				CTHX	1993	0.69	PH	Dike17	2000	2	43.497	R	Central					CTHXall	1992	3.728	PH
				CTHX	1994	3.452	PH	Dike17	2001	1	11.363	R	Central					CTHXall	1993	1.381	PH
				CTHX	1995	4.971	PH	Dike17	2001	2	55.925	R	Central					CTHXall	1994	2.071	PH
				CTHX	1996	3.107	PH	Dike17	2002	1	50.401	R	Central					CTHXall	1995	5.592	PH
				CTHX	1997	3.107	PH	Dike17	2002	2	155.347	R	Central					CTHXall	1996	3.728	PH
				CTHX	1998	22.37	PH	Dike17	2003	1	31.76	R	Central					CTHXall	1997	6.835	PH
				CTHX	1999	8.699	PH	Dike17	2003	2	56.906	R	Central					CTHXall	1998	8.078	PH
				CTHX	2000	8.078	PH	Dike17	2004	1	7.595	R	Central					CTHXall	1999	2.486	PH
				CTHX	2001	4.35	PH	Dike17	2004	2	45.568	R	Central					CTHXall	2000	4.35	PH
				CTHX	2002	0.621	PH	Dike17	2005	1	34.522	R	Central					CTHXall	2001	3.728	PH
				CTHX	2003	0.518	PH	Dike17	2005	2	62.475	R	Central					CTHXall	2002	0.621	PH
				CTHX	2004	0.731	PH	Dike17	2006	1	51.782	R	Central					CTHXall	2003	0	PH
				CTHX	2005	0.414	PH	Dike17	2006	2	33.141	R	Central					CTHXall	2004	1.864	PH
				CTHX	2006	0.414	PH	Dike17	2007	1	16.57	R	Central					CTHXall	2005	2.486	PH
				CTHX	2007	0.366	PH	Dike17	2007	2	28.78	R	Central					CTHXall	2006	1.243	PH
				CTHX	2008	0	PH	Dike17	2008	1	7.595	R	Central					CTHXall	2007	4.35	PH
				CTHX	2009	0	PH	Dike17	2008	2	16.794	R	Central					CTHXall	2008	1.864	PH
				CTHX	2010	0	PH	Dike17	2009	1	28.308	R	Central					CTHXall	2009	3.107	PH
				CTHX	2011	0	PH	Dike17	2009	2	32.45	R	Central					CTHXall	2010	11.185	PH
				CTHX	2012	0	PH	Dike17	2010	1	25.396	R	Central					CTHXall	2011	1.243	PH
				CTHX	2013	0	PH	Dike17	2010	2	31.76	R	Central					CTHXall	2012	1.243	PH
				CTHX	2014	0	PH	Dike17	2011	1	14.992	R	Central					CTHXall	2013	0.621	PH
				Dike17	1992	0	R	Dike17	2011	2	71.805	R	Central					CTHXall	2014	0.621	PH
				Dike17	1993	0	R	Dike17	2012	1	38.664	R	Central					Dike17	1991	0.621	R
				Dike17	1994	0	R	Dike17	2012	2	23.475	R	Central					Dike17	1992	0.621	R
				Dike17	1995	1.243	R	Dike17	2013	1	1.058	R	Central					Dike17	1993	0	R
				Dike17	1996	0.672	R	Dike17	2013	2	2.687	R	Central					Dike17	1994	0.606	R
				Dike17	1997	0	R	Dike17	2014	1	2.071	R	Central					Dike17	1995	1.243	R
				Dike17	1998	0	R	Dike17	2014	2	1.381	R	Central					Dike17	1996	0.71	R
				Dike17	1999	0	R	SBRW4	1992	1	4.971	R	Central					Dike17	1997	0.71	R
				Dike17	2000	0	R	SBRW4	1992	2	9.942	R	Central					Dike17	1998	2.841	R
				Dike17	2001	0	R	SBRW4	1993	1	1.775	R	Central					Dike17	1999	0	R
				Dike17	2002	0	R	SBRW4	1993	2	7.457	R	Central					Dike17	2000	0.71	R
				Dike17	2003	0	R	SBRW4	1994	1	47.936	R	Central					Dike17	2001	0	R
				Dike17	2004	0	R	SBRW4	1994	2	21.749	R	Central					Dike17	2002	0.69	R
				Dike17	2005	0	R	SBRW4	1995	1	35.508	R	Central					Dike17	2003	0.672	R
				Dike17	2006	0	R	SBRW4	1995	2	10.652	R	Central					Dike17	2004	1.462	R
				Dike17	2007	0	R	SBRW4	1996	1	9.321	R	Central					Dike17	2005	0	R
				Dike17	2008	0	R	SBRW4	1996	2	4.143	R	Central					Dike17	2006	1.156	R
				Dike17	2009	0	R	SBRW4	1997	1	27.962	R	Central					Dike17	2007	1.381	R
				Dike17	2010	0	R	SBRW4	1997	2	81.668	R	Central					Dike17	2008	0	R
				Dike17	2011	0	R	SBRW4	1998	1	177.539	R	Central					Dike17	2009	0	R
				Dike17	2012	0	R	SBRW4	1998	2	53.262	R	Central					Dike17	2010	3.452	R
				Dike17	2013	0	R	SBRW4	1999	1	17.754	R	Central					Dike17	2011	0	R
				Dike17	2014	0	R	SBRW4	1999	2	21.305	R	Central					Dike17	2012	0.69	R
				NBRE	1992	0	SM	SBRW4	2000	1	6.214	R	Central					Dike17	2013	0	R
				NBRE	1993	0	SM	SBRW4	2000	2	37.283	R	Central					Dike17	2014	0	R
				NBRE	1994	2.762	SM	SBRW4	2001	1	13.809	R	Central					NBRE	1992	0	SM
				NBRE	1995	1.775	SM	SBRW4	2001	2	46.16	R	Central					NBRE	1993	0	SM
				NBRE	1996	0	SM	SBRW4	2002	1	12.428	R	Central					NBRE	1994	1.381	SM
				NBRE	1997	2.071	SM	SBRW4	2002	2	78.117	R	Central					NBRE	1995	0	SM
				NBRE	1998	1.912	SM	SBRW4	2003	1	103.565	R	Central					NBRE	1996	0	SM
				NBRE	1999	0	SM	SBRW4	2003	2	53.262	R	Central					NBRE	1997	1.775	SM
				NBRE	2000	0	SM	SBRW4	2004	1	14.203	R	Central					NBRE	1998	3.824	SM
				NBRE	2001	1.553	SM	SBRW4	2004	2	28.998	R	Central					NBRE	1999	7.102	SM
				NBRE	2002	0	SM	SBRW4	2005	1	28.406	R	Central					NBRE	2000	1.775	SM
				NBRE	2003	1.553	SM	SBRW4	2005	2	81.668	R	Central					NBRE	2001	3.107	SM
				NBRE	2004	1.553	SM	SBRW4	2006	1	43.497	R	Central					NBRE	2002	1.657	SM
				NBRE	2005	0	SM	SBRW4	2006	2	149.133	R	Central					NBRE	2003	1.553	SM
				NBRE	2006	0	SM	SBRW4	2007	1	65.246	R	Central					NBRE	2004	0	SM
				NBRE	2007	1.13	SM	SBRW4	2007	2	108.743	R	Central					NBRE	2005	6.214	SM
				NBRE	2008	1.381	SM	SBRW4	2008	1	37.283	R	Central					NBRE	2006	8.699	SM
				NBRE	2009	0	SM	SBRW4	2008	2	62.139	R	Central					NBRE	2007	1.036	SM
				NBRE	2010	1.381	SM	SBRW4	2009	1	90.101	R	Central					NBRE	2008	1.381	SM
				NBRE	2011	1.553	SM	SBRW4	2009	2	71.016	R	Central					NBRE	2009	1.381	SM
				NBRE	2012	1.553	SM	SBRW4	2010	1	40.39	R	Central					NBRE	2010	10.874	SM
				NBRE	2013	0	SM	SBRW4	2010	2	40.39	R	Central					NBRE	2011	0	SM
				NBRE	2014	0	SM	SBRW4	2011	1	71.46	R	Central					NBRE	2012	3.107	SM
				SBRW1	1992	2.486	R	SBRW4	2011	2	211.272	R	Central					NBRE	2013	0	SM
				SBRW1	1993	0	R	SBRW4	2012	1	40.39	R	Central					NBRE	2014	1.381	SM
				SBRW1	1994	0	R	SBRW4	2012	2	77.674	R	Central					SBRW1	1992	0	R
				SBRW1	1995	3.107	R	SBRW4	2013	1	18.642	R	Central					SBRW1	1993	1.775	R
				SBRW1	1996	0	R	SBRW4	2013	2	24.856	R	Central					SBRW1	1994	0	R
				SBRW1	1997	0	R	SBRW4	2014	1	6.214	R	Central					SBRW1	1995	2.762	R
				SBRW1	1998	0	R	SBRW4	2014	2	6.214	R	Central					SBRW1	1996	0	R
				SBRW1	1999	2.071	R	StanM	1991	1	13.809	PH	Central					SBRW1	1997	3.107	R
				SBRW1	2000	8.285	R	StanM	1991	2	86.994	PH	Central					SBRW1	1998	2.762	R
				SBRW1	2001	4.519	R	StanM	1992	1	20.195	PH	Central					SBRW1	1999	2.762	R
				SBRW1	2002	4.519	R	StanM	1992	2	55.925	PH	Central					SBRW1	2000	0	R
				SBRW1	2003	0	R	StanM	1993	1	0	PH	Central					SBRW1	2001	4.519	R
				SBRW1	2004	4.143	R	StanM	1993	2	36.53	PH	Central					SBRW1	2002	0	R
				SBRW1	2005	2.26	R	StanM	1994	1	39.673	PH	Central					SBRW1	2003	2.26	R
				SBRW1	2006	1.912	R	StanM	1994	2	136.705	PH	Central					SBRW1	2004	6.214	R
				SBRW1	2007	1.912	R	StanM	1995	1	9.321	PH	Central					SBRW1	2005	2.26	R
				SBRW1	2008	0	R	StanM	1995	2	29.59	PH	Central					SBRW1	2006	3.824	R
				SBRW1	2009	0	R	StanM	1996	1	4.35	PH	Central					SBRW1	2007	5.736	R
				SBRW1	2010	0	R	StanM	1996	2	23.302	PH	Central					SBRW1	2008	1.912	R
				SBRW1	2011	1.912	R	StanM	1997	1	26.844	PH	Central					SBRW1	2009	2.071	R
				SBRW1	2012	1.912	R	StanM	1997	2	52.694	PH	Central					SBRW1	2010	11.472	R
				SBRW1	2013	0	R	StanM	1998	1	84.627	PH	Central					SBRW1	2011	9.56	R
				SBRW1	2014	0	R	StanM	1998	2	24.856	PH	Central					SBRW1	2012	3.824	R
				SBRW4	1992	0	R	StanM	1999	1	1.962	PH	Central					SBRW1	2013	0	R
				SBRW4	1993	0	R	StanM	1999	2	4.971	PH	Central					SBRW1	2014	1.775	R
				SBRW4	1994	2.486	R	StanM	2000	1	1.184	PH	Central					SBRW4	1992	0	R
				SBRW4	1995	0	R	StanM	2000	2	4.143	PH	Central					SBRW4	1993	0	R
				SBRW4	1996	0	R	StanM	2001	1	5.326	PH	Central					SBRW4	1994	4.143	R
				SBRW4	1997	2.486	R	StanM	2001	2	7.102	PH	Central					SBRW4	1995	2.762	R
				SBRW4	1998	12.428	R	StanM	2002	1	2.959	PH	Central					SBRW4	1996	0	R
				SBRW4	1999	9.942	R	StanM	2002	2	2.959	PH	Central					SBRW4	1997	7.457	R
				SBRW4	2000	6.214	R	StanM	2003	1	11.244	PH	Central					SBRW4	1998	3.107	R
				SBRW4	2001	8.285	R	StanM	2003	2	5.918	PH	Central					SBRW4	1999	7.457	R
				SBRW4	2002	3.551	R	StanM	2004	1	1.184	PH	Central					SBRW4	2000	6.214	R
				SBRW4	2003	3.551	R	StanM	2004	2	3.551	PH	Central					SBRW4	2001	8.285	R
				SBRW4	2004	6.214	R	StanM	2005	1	2.959	PH	Central					SBRW4	2002	14.203	R
				SBRW4	2005	6.214	R	StanM	2005	2	3.551	PH	Central					SBRW4	2003	3.551	R
				SBRW4	2006	3.107	R	StanM	2006	1	5.326	PH	Central					SBRW4	2004	8.699	R
				SBRW4	2007	5.523	R	StanM	2006	2	6.51	PH	Central					SBRW4	2005	6.214	R
				SBRW4	2008	2.486	R	StanM	2007	1	7.565	PH	Central					SBRW4	2006	9.321	R
				SBRW4	2009	1.775	R	StanM	2007	2	6.484	PH	Central					SBRW4	2007	16.57	R
				SBRW4	2010	3.824	R	StanM	2008	1	0.592	PH	Central					SBRW4	2008	7.102	R
				SBRW4	2011	0	R	StanM	2008	2	0.592	PH	Central					SBRW4	2009	6.214	R
				SBRW4	2012	3.107	R	StanM	2009	1	2.367	PH	Central					SBRW4	2010	37.283	R
				SBRW4	2013	0	R	StanM	2009	2	6.51	PH	Central					SBRW4	2011	18.642	R
				SBRW4	2014	3.107	R	StanM	2010	1	2.959	PH	Central					SBRW4	2012	21.749	R
				Sand2	1992	0	R	StanM	2010	2	6.51	PH	Central					SBRW4	2013	3.107	R
				Sand2	1994	12.428	R	StanM	2011	1	0.592	PH	Central					SBRW4	2014	6.214	R
				Sand2	1995	0	R	StanM	2011	2	13.02	PH	Central					Sand7	1993	0	R
				Sand2	1996	0	R	StanM	2012	1	8.877	PH	Central					Sand7	1994	1.243	R
				Sand2	1997	3.551	R	StanM	2012	2	11.836	PH	Central					Sand7	1995	1.553	R
				Sand2	1998	0	R	StanM	2013	1	4.143	PH	Central					Sand7	1996	5.736	R
				Sand2	1999	0	R	StanM	2013	2	3.682	PH	Central					Sand7	1997	0	R
				Sand2	2000	7.102	R	StanM	2014	1	1.184	PH	Central					Sand7	1998	4.971	R
				Sand2	2001	0	R	StanM	2014	2	16.57	PH	Central					Sand7	1999	1.775	R
				Sand2	2002	0	R	WCM2	1992	1	80.78	SM	Central					Sand7	2000	1.381	R
				Sand2	2003	0	R	WCM2	1992	2	36.248	SM	Central					Sand7	2001	0	R
				Sand2	2004	0	R	WCM2	1993	1	0	SM	Central					Sand7	2002	0	R
				Sand2	2005	0	R	WCM2	1993	2	22.784	SM	Central					Sand7	2003	1.553	R
				Sand2	2006	0	R	WCM2	1994	1	43.497	SM	Central					Sand7	2004	0	R
				Sand2	2007	0	R	WCM2	1994	2	49.711	SM	Central					Sand7	2005	0	R
				Sand2	2008	0	R	WCM2	1995	1	27.962	SM	Central					Sand7	2006	0	R
				Sand2	2009	0	R	WCM2	1995	2	16.57	SM	Central					Sand7	2007	1.381	R
				Sand2	2010	0	R	WCM2	1996	1	9.321	SM	Central					Sand7	2008	0	R
				Sand2	2011	0	R	WCM2	1996	2	42.609	SM	Central					Sand7	2009	0	R
				Sand2	2012	0	R	WCM2	1997	1	62.139	SM	Central					Sand7	2010	0	R
				Sand2	2013	0	R	WCM2	1997	2	74.567	SM	Central					Sand7	2011	0	R
				Sand2	2014	0	R	WCM2	1998	1	107.707	SM	Central					Sand7	2012	1.553	R
				Sand3	1992	0	R	WCM2	1998	2	22.37	SM	Central					Sand7	2013	0	R
				Sand3	1994	0	R	WCM2	1999	1	17.399	SM	Central					Sand7	2014	0	R
				Sand3	1995	0	R	WCM2	1999	2	12.428	SM	Central					StanM	1991	6.904	PH
				Sand3	1996	0	R	WCM2	2000	1	2.486	SM	Central					StanM	1992	0	PH
				Sand3	1997	0	R	WCM2	2000	2	7.457	SM	Central					StanM	1993	0.518	PH
				Sand3	1998	3.107	R	WCM2	2001	1	9.942	SM	Central					StanM	1994	1.434	PH
				Sand3	1999	0	R	WCM2	2001	2	2.486	SM	Central					StanM	1995	7.767	PH
				Sand3	2000	0	R	WCM2	2002	1	0	SM	Central					StanM	1996	1.243	PH
				Sand3	2001	0	R	WCM2	2002	2	4.971	SM	Central					StanM	1997	4.971	PH
				Sand3	2002	0	R	WCM2	2003	1	4.971	SM	Central					StanM	1998	7.102	PH
				Sand3	2003	0	R	WCM2	2003	2	0	SM	Central					StanM	1999	2.616	PH
				Sand3	2004	0	R	WCM2	2004	1	2.486	SM	Central					StanM	2000	3.551	PH
				Sand3	2005	0	R	WCM2	2004	2	2.486	SM	Central					StanM	2001	1.184	PH
				Sand3	2006	0	R	WCM2	2005	1	0	SM	Central					StanM	2002	1.775	PH
				Sand3	2007	0	R	WCM2	2005	2	0	SM	Central					StanM	2003	1.775	PH
				Sand3	2008	0	R	WCM2	2006	1	6.779	SM	Central					StanM	2004	1.184	PH
				Sand3	2009	0	R	WCM2	2006	2	4.971	SM	Central					StanM	2005	0.592	PH
				Sand3	2010	0	R	WCM2	2007	1	0	SM	Central					StanM	2006	1.775	PH
				Sand3	2011	0	R	WCM2	2007	2	0	SM	Central					StanM	2007	2.702	PH
				Sand3	2012	0	R	WCM2	2008	1	0	SM	Central					StanM	2008	0	PH
				Sand3	2013	0	R	WCM2	2008	2	0	SM	Central					StanM	2009	0	PH
				Sand3	2014	0	R	WCM2	2009	1	0	SM	Central					StanM	2010	1.184	PH
				StanM	1992	0	PH	WCM2	2009	2	0	SM	Central					StanM	2011	3.551	PH
				StanM	1993	0.518	PH	WCM2	2010	1	0	SM	Central					StanM	2012	2.959	PH
				StanM	1994	0.478	PH	WCM2	2010	2	0	SM	Central					StanM	2013	2.367	PH
				StanM	1995	0.777	PH	WCM2	2011	1	0	SM	Central					StanM	2014	0	PH
				StanM	1996	0	PH	WCM2	2011	2	0	SM	Central					WCM2	1992	0	SM
				StanM	1997	0	PH	WCM2	2012	1	0	SM	Central					WCM2	1993	0	SM
				StanM	1998	0	PH	WCM2	2012	2	2.486	SM	Central					WCM2	1994	2.071	SM
				StanM	1999	0	PH	WCM2	2013	1	0	SM	Central					WCM2	1995	0	SM
				StanM	2000	0	PH	WCM2	2013	2	3.107	SM	Central					WCM2	1996	0	SM
				StanM	2001	0	PH	WCM2	2014	1	0	SM	Central					WCM2	1997	2.486	SM
				StanM	2002	0	PH	WCM2	2014	2	0	SM	Central					WCM2	1998	2.486	SM
				StanM	2003	0	PH	WCM4	1992	1	24.856	SM	Central					WCM2	1999	2.486	SM
				StanM	2004	0	PH	WCM4	1992	2	88.906	SM	Central					WCM2	2000	2.486	SM
				StanM	2005	0	PH	WCM4	1993	1	0	SM	Central					WCM2	2001	0	SM
				StanM	2006	0	PH	WCM4	1993	2	27.962	SM	Central					WCM2	2002	0	SM
				StanM	2007	0	PH	WCM4	1994	1	24.856	SM	Central					WCM2	2003	2.486	SM
				StanM	2008	0	PH	WCM4	1994	2	63.269	SM	Central					WCM2	2004	4.143	SM
				StanM	2009	0	PH	WCM4	1995	1	15.296	SM	Central					WCM2	2005	2.26	SM
				StanM	2010	0	PH	WCM4	1995	2	26.927	SM	Central					WCM2	2006	2.486	SM
				StanM	2011	0	PH	WCM4	1996	1	6.214	SM	Central					WCM2	2007	1.912	SM
				StanM	2012	1.184	PH	WCM4	1996	2	28.584	SM	Central					WCM2	2008	0	SM
				StanM	2013	0	PH	WCM4	1997	1	28.679	SM	Central					WCM2	2009	0	SM
				StanM	2014	0	PH	WCM4	1997	2	63.174	SM	Central					WCM2	2010	0	SM
				WCM2	1992	3.107	SM	WCM4	1998	1	36.248	SM	Central					WCM2	2011	0	SM
				WCM2	1993	0	SM	WCM4	1998	2	45.568	SM	Central					WCM2	2012	12.428	SM
				WCM2	1994	6.214	SM	WCM4	1999	1	5.649	SM	Central					WCM2	2013	0	SM
				WCM2	1995	7.457	SM	WCM4	1999	2	46.604	SM	Central					WCM2	2014	0	SM
				WCM2	1996	0	SM	WCM4	2000	1	6.214	SM	Central					WCM4	1992	0	SM
				WCM2	1997	2.071	SM	WCM4	2000	2	33.894	SM	Central					WCM4	1993	0	SM
				WCM2	1998	2.486	SM	WCM4	2001	1	11.392	SM	Central					WCM4	1994	3.27	SM
				WCM2	1999	2.762	SM	WCM4	2001	2	13.463	SM	Central					WCM4	1995	2.486	SM
				WCM2	2000	0	SM	WCM4	2002	1	4.143	SM	Central					WCM4	1996	4.519	SM
				WCM2	2001	4.971	SM	WCM4	2002	2	42.932	SM	Central					WCM4	1997	4.78	SM
				WCM2	2002	0	SM	WCM4	2003	1	11.298	SM	Central					WCM4	1998	3.107	SM
				WCM2	2003	0	SM	WCM4	2003	2	22.596	SM	Central					WCM4	1999	4.78	SM
				WCM2	2004	0	SM	WCM4	2004	1	4.734	SM	Central					WCM4	2000	6.214	SM
				WCM2	2005	0	SM	WCM4	2004	2	12.428	SM	Central					WCM4	2001	2.071	SM
				WCM2	2006	0	SM	WCM4	2005	1	6.214	SM	Central					WCM4	2002	3.551	SM
				WCM2	2007	0	SM	WCM4	2005	2	13.558	SM	Central					WCM4	2003	3.107	SM
				WCM2	2008	0	SM	WCM4	2006	1	6.779	SM	Central					WCM4	2004	7.25	SM
				WCM2	2009	0	SM	WCM4	2006	2	22.784	SM	Central					WCM4	2005	1.036	SM
				WCM2	2010	0	SM	WCM4	2007	1	3.314	SM	Central					WCM4	2006	6.214	SM
				WCM2	2011	0	SM	WCM4	2007	2	3.824	SM	Central					WCM4	2007	3.824	SM
				WCM2	2012	2.486	SM	WCM4	2008	1	1.036	SM	Central					WCM4	2008	1.036	SM
				WCM2	2013	0	SM	WCM4	2008	2	4.143	SM	Central					WCM4	2009	0	SM
				WCM2	2014	0	SM	WCM4	2009	1	2.071	SM	Central					WCM4	2010	3.107	SM
				WCM4	1992	1.553	SM	WCM4	2009	2	1.13	SM	Central					WCM4	2011	0	SM
				WCM4	1993	3.728	SM	WCM4	2010	1	0	SM	Central					WCM4	2012	3.824	SM
				WCM4	1994	2.616	SM	WCM4	2010	2	2.071	SM	Central					WCM4	2013	0	SM
				WCM4	1995	1.243	SM	WCM4	2011	1	1.036	SM	Central					WCM4	2014	1.912	SM
				WCM4	1996	1.13	SM	WCM4	2011	2	5.326	SM	Central					WCM5/1	1994	2.486	PH
				WCM4	1997	0.777	SM	WCM4	2012	1	0.956	SM	Central					WCM5/1	1995	0	PH
				WCM4	1998	0	SM	WCM4	2012	2	3.107	SM	Central					WCM5/1	1996	2.486	PH
				WCM4	1999	0.956	SM	WCM4	2013	1	1.13	SM	Central					WCM5/1	1997	0	PH
				WCM4	2000	1.036	SM	WCM4	2013	2	1.13	SM	Central					WCM5/1	1998	4.971	PH
				WCM4	2001	0	SM	WCM4	2014	1	0	SM	Central					WCM5/1	1999	0	PH
				WCM4	2002	0	SM	WCM4	2014	2	0	SM	Central					WCM5/1	2000	7.457	PH
				WCM4	2003	0	SM	WCM5/1	1994	1	24.856	PH	Central					WCM5/1	2001	2.486	PH
				WCM4	2004	0	SM	WCM5/1	1994	2	46.604	PH	Central					WCM5/1	2002	0	PH
				WCM4	2005	0	SM	WCM5/1	1995	1	2.762	PH	Central					WCM5/1	2003	0	PH
				WCM4	2006	0	SM	WCM5/1	1995	2	37.283	PH	Central					WCM5/1	2004	12.428	PH
				WCM4	2007	0	SM	WCM5/1	1996	1	2.486	PH	Central					WCM5/1	2005	9.942	PH
				WCM4	2008	0	SM	WCM5/1	1996	2	4.971	PH	Central					WCM5/1	2006	2.486	PH
				WCM4	2009	0	SM	WCM5/1	1997	1	7.457	PH	Central					WCM5/1	2007	0	PH
				WCM4	2010	0	SM	WCM5/1	1997	2	94.451	PH	Central					WCM5/1	2008	0	PH
				WCM4	2011	0	SM	WCM5/1	1998	1	20.336	PH	Central					WCM5/1	2009	0	PH
				WCM4	2012	0	SM	WCM5/1	1998	2	49.711	PH	Central					WCM5/1	2010	0	PH
				WCM4	2013	0	SM	WCM5/1	1999	1	9.942	PH	Central					WCM5/1	2011	2.486	PH
				WCM4	2014	0	SM	WCM5/1	1999	2	49.711	PH	Central					WCM5/1	2012	0	PH
				WCM5/1	1992	4.143	PH	WCM5/1	2000	1	2.486	PH	Central					WCM5/1	2013	0	PH
				WCM5/1	1994	2.486	PH	WCM5/1	2000	2	17.399	PH	Central					WCM5/1	2014	0	PH
				WCM5/1	1995	0	PH	WCM5/1	2001	1	9.942	PH	Central					WildSpNE	1991	3.107	SM
				WCM5/1	1996	0	PH	WCM5/1	2001	2	9.942	PH	Central					WildSpNE	1992	0	SM
				WCM5/1	1997	0	PH	WCM5/1	2002	1	4.971	PH	Central					WildSpNE	1993	0	SM
				WCM5/1	1998	0	PH	WCM5/1	2002	2	39.769	PH	Central					WildSpNE	1994	0	SM
				WCM5/1	1999	0	PH	WCM5/1	2003	1	7.457	PH	Central					WildSpNE	1995	0	SM
				WCM5/1	2000	0	PH	WCM5/1	2003	2	24.856	PH	Central					WildSpNE	1996	1.381	SM
				WCM5/1	2001	2.486	PH	WCM5/1	2004	1	2.486	PH	Central					WildSpNE	1997	2.486	SM
				WCM5/1	2002	0	PH	WCM5/1	2004	2	2.486	PH	Central					WildSpNE	1998	1.381	SM
				WCM5/1	2003	0	PH	WCM5/1	2005	1	2.486	PH	Central					WildSpNE	1999	2.486	SM
				WCM5/1	2004	0	PH	WCM5/1	2005	2	4.971	PH	Central					WildSpNE	2000	1.243	SM
				WCM5/1	2005	0	PH	WCM5/1	2006	1	0	PH	Central					WildSpNE	2001	0	SM
				WCM5/1	2006	0	PH	WCM5/1	2006	2	12.428	PH	Central					WildSpNE	2002	1.184	SM
				WCM5/1	2007	0	PH	WCM5/1	2007	1	0	PH	Central					WildSpNE	2003	0	SM
				WCM5/1	2008	0	PH	WCM5/1	2007	2	0	PH	Central					WildSpNE	2004	3.242	SM
				WCM5/1	2009	0	PH	WCM5/1	2008	1	0	PH	Central					WildSpNE	2005	2.367	SM
				WCM5/1	2010	0	PH	WCM5/1	2008	2	0	PH	Central					WildSpNE	2006	0	SM
				WCM5/1	2011	0	PH	WCM5/1	2009	1	0	PH	Central					WildSpNE	2007	1.036	SM
				WCM5/1	2012	0	PH	WCM5/1	2009	2	0	PH	Central					WildSpNE	2008	0.994	SM
				WCM5/1	2013	0	PH	WCM5/1	2010	1	0	PH	Central					WildSpNE	2009	0	SM
				WCM5/1	2014	0	PH	WCM5/1	2010	2	0	PH	Central					WildSpNE	2010	0	SM
				WildSpNE	1992	0	SM	WCM5/1	2011	1	0	PH	Central					WildSpNE	2011	2.26	SM
				WildSpNE	1993	0	SM	WCM5/1	2011	2	0	PH	Central					WildSpNE	2012	1.13	SM
				WildSpNE	1994	0	SM	WCM5/1	2012	1	0	PH	Central					WildSpNE	2013	0	SM
				WildSpNE	1995	1.243	SM	WCM5/1	2012	2	0	PH	Central					WildSpNE	2014	0	SM
				WildSpNE	1996	1.381	SM	WCM5/1	2013	1	0	PH	Central					WildSpSE	1991	16.57	SM
				WildSpNE	1997	0	SM	WCM5/1	2013	2	0	PH	Central					WildSpSE	1993	0	SM
				WildSpNE	1998	1.381	SM	WCM5/1	2014	1	0	PH	Central					WildSpSE	1994	1.553	SM
				WildSpNE	1999	0	SM	WCM5/1	2014	2	0	PH	Central					WildSpSE	1995	9.942	SM
				WildSpNE	2000	0	SM	WildSpNE	1991	1	57.478	SM	Central					WildSpSE	1996	6.214	SM
				WildSpNE	2001	0	SM	WildSpNE	1991	2	46.322	SM	Central					WildSpSE	1997	8.285	SM
				WildSpNE	2002	0	SM	WildSpNE	1992	1	67.11	SM	Central					WildSpSE	1998	0	SM
				WildSpNE	2003	0	SM	WildSpNE	1992	2	86.994	SM	Central					WildSpSE	1999	2.486	SM
				WildSpNE	2004	0	SM	WildSpNE	1993	1	0	SM	Central					WildSpSE	2000	9.942	SM
				WildSpNE	2005	0	SM	WildSpNE	1993	2	62.967	SM	Central					WildSpSE	2001	0	SM
				WildSpNE	2006	0	SM	WildSpNE	1994	1	25.985	SM	Central					WildSpSE	2002	0	SM
				WildSpNE	2007	0	SM	WildSpNE	1994	2	137.948	SM	Central					WildSpSE	2003	2.486	SM
				WildSpNE	2008	0	SM	WildSpNE	1995	1	34.522	SM	Central					WildSpSE	2004	0	SM
				WildSpNE	2009	0	SM	WildSpNE	1995	2	32.312	SM	Central					WildSpSE	2005	0	SM
				WildSpNE	2010	0	SM	WildSpNE	1996	1	2.762	SM	Central					WildSpSE	2006	0	SM
				WildSpNE	2011	0	SM	WildSpNE	1996	2	24.856	SM	Central					WildSpSE	2007	0	SM
				WildSpNE	2012	0	SM	WildSpNE	1997	1	18.642	SM	Central					WildSpSE	2008	0	SM
				WildSpNE	2013	0	SM	WildSpNE	1997	2	92.643	SM	Central					WildSpSE	2009	0	SM
				WildSpNE	2014	0	SM	WildSpNE	1998	1	67.11	SM	Central					WildSpSE	2010	0	SM
				WildSpSE	1993	0	SM	WildSpNE	1998	2	24.856	SM	Central					WildSpSE	2011	0	SM
				WildSpSE	1994	3.107	SM	WildSpNE	1999	1	8.699	SM	Central					WildSpSE	2012	0	SM
				WildSpSE	1995	2.486	SM	WildSpNE	1999	2	8.699	SM	Central					WildSpSE	2013	0	SM
				WildSpSE	1996	9.321	SM	WildSpNE	2000	1	4.519	SM	Central					WildSpSE	2014	0	SM
				WildSpSE	1997	0	SM	WildSpNE	2000	2	12.428	SM	Central					XEW	1992	0	PH
				WildSpSE	1998	4.971	SM	WildSpNE	2001	1	4.734	SM	Central					XEW	1993	1.864	PH
				WildSpSE	1999	0	SM	WildSpNE	2001	2	16.57	SM	Central					XEW	1994	2.33	PH
				WildSpSE	2000	0	SM	WildSpNE	2002	1	3.551	SM	Central					XEW	1995	4.66	PH
				WildSpSE	2001	0	SM	WildSpNE	2002	2	21.466	SM	Central					XEW	1996	7.102	PH
				WildSpSE	2002	0	SM	WildSpNE	2003	1	9.038	SM	Central					XEW	1997	6.692	PH
				WildSpSE	2003	0	SM	WildSpNE	2003	2	13.671	SM	Central					XEW	1998	18.164	PH
				WildSpSE	2004	0	SM	WildSpNE	2004	1	1.13	SM	Central					XEW	1999	3.107	PH
				WildSpSE	2005	0	SM	WildSpNE	2004	2	0	SM	Central					XEW	2000	3.107	PH
				WildSpSE	2006	0	SM	WildSpNE	2005	1	1.184	SM	Central					XEW	2001	0	PH
				WildSpSE	2007	0	SM	WildSpNE	2005	2	3.551	SM	Central					XEW	2002	3.107	PH
				WildSpSE	2008	0	SM	WildSpNE	2006	1	0	SM	Central					XEW	2003	2.868	PH
				WildSpSE	2009	0	SM	WildSpNE	2006	2	0	SM	Central					XEW	2004	1.036	PH
				WildSpSE	2010	0	SM	WildSpNE	2007	1	0	SM	Central					XEW	2005	1.036	PH
				WildSpSE	2011	0	SM	WildSpNE	2007	2	0	SM	Central					XEW	2006	1.036	PH
				WildSpSE	2012	0	SM	WildSpNE	2008	1	0	SM	Central					XEW	2007	2.486	PH
				WildSpSE	2013	0	SM	WildSpNE	2008	2	0	SM	Central					XEW	2008	0.731	PH
				WildSpSE	2014	0	SM	WildSpNE	2009	1	0	SM	Central					XEW	2009	0.956	PH
				WoodCFX	2003	16.57	SM	WildSpNE	2009	2	0	SM	Central					XEW	2010	2.33	PH
				WoodCFX	2004	1.775	SM	WildSpNE	2010	1	0	SM	Central					XEW	2011	1.912	PH
				WoodCFX	2005	0	SM	WildSpNE	2010	2	2.26	SM	Central					XEW	2012	0.956	PH
				WoodCFX	2006	0	SM	WildSpNE	2011	1	0	SM	Central					XEW	2013	0.956	PH
				WoodCFX	2007	0	SM	WildSpNE	2011	2	0	SM	Central					XEW	2014	0	PH
				WoodCFX	2008	0	SM	WildSpNE	2012	1	2.26	SM	Central					XS	1993	0	PH
				WoodCFX	2009	2.486	SM	WildSpNE	2012	2	0	SM	Central					XS	1994	2.486	PH
				WoodCFX	2010	2.486	SM	WildSpNE	2013	1	1.13	SM	Central					XS	1995	7.457	PH
				WoodCFX	2011	0	SM	WildSpNE	2013	2	6.779	SM	Central					XS	1996	14.913	PH
				WoodCFX	2012	0	SM	WildSpNE	2014	1	2.486	SM	Central					XS	1997	31.069	PH
				WoodCFX	2013	0	SM	WildSpNE	2014	2	1.243	SM	Central					XS	1998	14.913	PH
				WoodCFX	2014	0	SM	WildSpSE	1993	1	0	SM	Central					XS	1999	9.038	PH
				XS	1993	3.107	PH	WildSpSE	1993	2	34.176	SM	Central					XS	2000	5.736	PH
				XS	1994	3.107	PH	WildSpSE	1994	1	29.827	SM	Central					XS	2001	8.285	PH
				XS	1995	17.399	PH	WildSpSE	1994	2	62.139	SM	Central					XS	2002	8.285	PH
				XS	1996	0	PH	WildSpSE	1995	1	2.071	SM	Central					XS	2003	1.243	PH
				XS	1997	0	PH	WildSpSE	1995	2	32.312	SM	Central					XS	2004	0	PH
				XS	1998	1.775	PH	WildSpSE	1996	1	12.428	SM	Central					XS	2005	1.462	PH
				XS	1999	2.486	PH	WildSpSE	1996	2	9.321	SM	Central					XS	2006	1.775	PH
				XS	2000	1.912	PH	WildSpSE	1997	1	44.74	SM	Central					XS	2007	4.143	PH
				XS	2001	2.071	PH	WildSpSE	1997	2	40.673	SM	Central					XS	2008	1.381	PH
				XS	2002	0	PH	WildSpSE	1998	1	77.052	SM	Central					XS	2009	5.736	PH
				XS	2003	1.775	PH	WildSpSE	1998	2	11.047	SM	Central					XS	2010	10.652	PH
				XS	2004	0	PH	WildSpSE	1999	1	2.486	SM	Central					XS	2011	0	PH
				XS	2005	0	PH	WildSpSE	1999	2	4.971	SM	Central					XS	2012	3.824	PH
				XS	2006	0	PH	WildSpSE	2000	1	0	SM	Central					XS	2013	1.775	PH
				XS	2007	0	PH	WildSpSE	2000	2	11.047	SM	Central					XS	2014	0	PH
				XS	2008	0	PH	WildSpSE	2001	1	2.26	SM	Central
				XS	2009	0	PH	WildSpSE	2001	2	0	SM	Central
				XS	2010	0	PH	WildSpSE	2002	1	0	SM	Central
				XS	2011	0	PH	WildSpSE	2002	2	2.486	SM	Central
				XS	2012	0	PH	WildSpSE	2003	1	2.486	SM	Central
				XS	2013	0	PH	WildSpSE	2003	2	0	SM	Central
				XS	2014	0	PH	WildSpSE	2004	1	0	SM	Central
								WildSpSE	2004	2	0	SM	Central
								WildSpSE	2005	1	2.486	SM	Central
								WildSpSE	2005	2	0	SM	Central
								WildSpSE	2006	1	0	SM	Central
								WildSpSE	2006	2	0	SM	Central
								WildSpSE	2007	1	0	SM	Central
								WildSpSE	2007	2	0	SM	Central
								WildSpSE	2008	1	0	SM	Central
								WildSpSE	2008	2	0	SM	Central
								WildSpSE	2009	1	0	SM	Central
								WildSpSE	2009	2	0	SM	Central
								WildSpSE	2010	1	0	SM	Central
								WildSpSE	2010	2	0	SM	Central
								WildSpSE	2011	1	0	SM	Central
								WildSpSE	2011	2	0	SM	Central
								WildSpSE	2012	1	0	SM	Central
								WildSpSE	2012	2	0	SM	Central
								WildSpSE	2013	1	0	SM	Central
								WildSpSE	2013	2	0	SM	Central
								WildSpSE	2014	1	0	SM	Central
								WildSpSE	2014	2	0	SM	Central
								XEW	1991	1	6.214	PH	Central
								XEW	1991	2	17.399	PH	Central
								XEW	1992	1	110.296	PH	Central
								XEW	1992	2	80.78	PH	Central
								XEW	1993	1	14.499	PH	Central
								XEW	1993	2	35.212	PH	Central
								XEW	1994	1	22.525	PH	Central
								XEW	1994	2	184.641	PH	Central
								XEW	1995	1	13.204	PH	Central
								XEW	1995	2	9.321	PH	Central
								XEW	1996	1	7.989	PH	Central
								XEW	1996	2	18.642	PH	Central
								XEW	1997	1	29.635	PH	Central
								XEW	1997	2	73.531	PH	Central
								XEW	1998	1	105.158	PH	Central
								XEW	1998	2	26.767	PH	Central
								XEW	1999	1	18.642	PH	Central
								XEW	1999	2	10.516	PH	Central
								XEW	2000	1	19.677	PH	Central
								XEW	2000	2	38.239	PH	Central
								XEW	2001	1	10.356	PH	Central
								XEW	2001	2	4.143	PH	Central
								XEW	2002	1	22.784	PH	Central
								XEW	2002	2	18.642	PH	Central
								XEW	2003	1	26.927	PH	Central
								XEW	2003	2	23.82	PH	Central
								XEW	2004	1	7.25	PH	Central
								XEW	2004	2	4.143	PH	Central
								XEW	2005	1	18.642	PH	Central
								XEW	2005	2	55.925	PH	Central
								XEW	2006	1	16.57	PH	Central
								XEW	2006	2	22.784	PH	Central
								XEW	2007	1	3.824	PH	Central
								XEW	2007	2	5.736	PH	Central
								XEW	2008	1	1.462	PH	Central
								XEW	2008	2	3.824	PH	Central
								XEW	2009	1	3.884	PH	Central
								XEW	2009	2	4.78	PH	Central
								XEW	2010	1	15.296	PH	Central
								XEW	2010	2	37.283	PH	Central
								XEW	2011	1	10.356	PH	Central
								XEW	2011	2	22.944	PH	Central
								XEW	2012	1	12.428	PH	Central
								XEW	2012	2	15.296	PH	Central
								XEW	2013	1	21.988	PH	Central
								XEW	2013	2	19.12	PH	Central
								XEW	2014	1	2.868	PH	Central
								XEW	2014	2	11.472	PH	Central
								CrJames	1991	2	6.214	R	Northwest
								CrJames	1992	2	1.775	R	Northwest
								CrJames	1993	2	5.326	R	Northwest
								CrJames	1994	2	8.285	R	Northwest
								CrJames	1995	2	3.551	R	Northwest
								CrJames	1996	2	4.143	R	Northwest
								CrJames	1997	2	7.102	R	Northwest
								CrJames	1998	2	14.203	R	Northwest
								CrJames	1999	2	4.143	R	Northwest
								CrJames	2000	2	7.767	R	Northwest
								CrJames	2001	2	4.143	R	Northwest
								CrJames	2002	2	7.767	R	Northwest
								CrJames	2003	2	0	R	Northwest
								CrJames	2004	2	3.551	R	Northwest
								CrJames	2005	2	3.107	R	Northwest
								CrJames	2006	2	1.381	R	Northwest
								CrJames	2007	2	0	R	Northwest
								CrJames	2008	2	0	R	Northwest
								CrJames	2009	2	1.13	R	Northwest
								CrJames	2010	2	0	R	Northwest
								CrJames	2011	2	9.942	R	Northwest
								CrJames	2012	2	0	R	Northwest
								CrJames	2013	2	2.486	R	Northwest
								CrJames	2014	2	0	R	Northwest
								CrKlots	1991	2	1.775	R	Northwest
								CrKlots	1992	2	0	R	Northwest
								CrKlots	1993	2	1.381	R	Northwest
								CrKlots	1994	2	31.069	R	Northwest
								CrKlots	1995	2	8.285	R	Northwest
								CrKlots	1996	2	6.214	R	Northwest
								CrKlots	1997	2	6.214	R	Northwest
								CrKlots	1998	2	19.332	R	Northwest
								CrKlots	1999	2	2.486	R	Northwest
								CrKlots	2000	2	7.767	R	Northwest
								CrKlots	2001	2	24.856	R	Northwest
								CrKlots	2002	2	14.913	R	Northwest
								CrKlots	2003	2	6.904	R	Northwest
								CrKlots	2004	2	0	R	Northwest
								CrKlots	2005	2	8.699	R	Northwest
								CrKlots	2006	2	0	R	Northwest
								CrKlots	2007	2	0	R	Northwest
								CrKlots	2008	2	0	R	Northwest
								CrKlots	2009	2	2.367	R	Northwest
								CrKlots	2010	2	4.971	R	Northwest
								CrKlots	2011	2	8.699	R	Northwest
								CrKlots	2012	2	1.243	R	Northwest
								CrKlots	2013	2	6.214	R	Northwest
								CrKlots	2014	2	1.243	R	Northwest
								CrMain	1991	2	2.762	R	Northwest
								CrMain	1992	2	10.356	R	Northwest
								CrMain	1993	2	0	R	Northwest
								CrMain	1994	2	19.332	R	Northwest
								CrMain	1995	2	35.902	R	Northwest
								CrMain	1997	2	37.283	R	Northwest
								CrMain	1998	2	24.856	R	Northwest
								CrMain	1999	2	37.283	R	Northwest
								CrMain	2000	2	15.817	R	Northwest
								CrMain	2001	2	28.406	R	Northwest
								CrMain	2002	2	5.523	R	Northwest
								CrMain	2003	2	24.856	R	Northwest
								CrMain	2004	2	3.551	R	Northwest
								CrMain	2005	2	19.884	R	Northwest
								CrMain	2006	2	9.321	R	Northwest
								CrMain	2007	2	0	R	Northwest
								CrMain	2008	2	0	R	Northwest
								CrMain	2009	2	0	R	Northwest
								CrMain	2010	2	3.824	R	Northwest
								CrMain	2011	2	13.558	R	Northwest
								CrMain	2012	2	3.824	R	Northwest
								CrMain	2013	2	7.31	R	Northwest
								CrMain	2014	2	2.26	R	Northwest
								CrNRef	1991	2	9.942	R	Northwest
								CrNRef	1992	2	0	R	Northwest
								CrNRef	1993	2	0	R	Northwest
								CrNRef	1994	2	1.775	R	Northwest
								CrNRef	1995	2	3.551	R	Northwest
								CrNRef	1996	2	0	R	Northwest
								CrNRef	1997	2	4.971	R	Northwest
								CrNRef	1998	2	3.314	R	Northwest
								CrNRef	1999	2	4.386	R	Northwest
								CrNRef	2000	2	2.486	R	Northwest
								CrNRef	2001	2	9.038	R	Northwest
								CrNRef	2002	2	8.699	R	Northwest
								CrNRef	2003	2	6.484	R	Northwest
								CrNRef	2004	2	12.428	R	Northwest
								CrNRef	2005	2	4.971	R	Northwest
								CrNRef	2006	2	4.143	R	Northwest
								CrNRef	2007	2	2.071	R	Northwest
								CrNRef	2008	2	2.071	R	Northwest
								CrNRef	2009	2	0	R	Northwest
								CrNRef	2010	2	10.168	R	Northwest
								CrNRef	2011	2	28.245	R	Northwest
								CrNRef	2012	2	2.26	R	Northwest
								CrNRef	2013	2	3.389	R	Northwest
								CrNRef	2014	2	1.243	R	Northwest
								CrPhant	1991	2	8.285	R	Northwest
								CrPhant	1992	2	19.12	R	Northwest
								CrPhant	1993	2	4.971	R	Northwest
								CrPhant	1994	2	17.399	R	Northwest
								CrPhant	1995	2	24.856	R	Northwest
								CrPhant	1996	2	12.428	R	Northwest
								CrPhant	1997	2	12.428	R	Northwest
								CrPhant	1998	2	21.614	R	Northwest
								CrPhant	1999	2	131.734	R	Northwest
								CrPhant	2000	2	32.312	R	Northwest
								CrPhant	2001	2	22.192	R	Northwest
								CrPhant	2002	2	27.341	R	Northwest
								CrPhant	2003	2	24.315	R	Northwest
								CrPhant	2004	2	8.105	R	Northwest
								CrPhant	2005	2	19.332	R	Northwest
								CrPhant	2006	2	2.486	R	Northwest
								CrPhant	2007	2	0	R	Northwest
								CrPhant	2008	2	0	R	Northwest
								CrPhant	2009	2	0	R	Northwest
								CrPhant	2010	2	0	R	Northwest
								CrPhant	2011	2	2.486	R	Northwest
								CrPhant	2012	2	0	R	Northwest
								CrPhant	2013	2	2.486	R	Northwest
								CrPhant	2014	2	0	R	Northwest
								CrReedE	1991	2	0	R	Northwest
								CrReedE	1992	2	3.107	R	Northwest
								CrReedE	1993	2	0	R	Northwest
								CrReedE	1994	2	10.356	R	Northwest
								CrReedE	1995	2	1.775	R	Northwest
								CrReedE	1996	2	0	R	Northwest
								CrReedE	1997	2	0	R	Northwest
								CrReedE	1998	2	8.285	R	Northwest
								CrReedE	1999	2	6.779	R	Northwest
								CrReedE	2000	2	0	R	Northwest
								CrReedE	2001	2	7.767	R	Northwest
								CrReedE	2002	2	7.31	R	Northwest
								CrReedE	2003	2	1.553	R	Northwest
								CrReedE	2004	2	14.203	R	Northwest
								CrReedE	2005	2	10.356	R	Northwest
								CrReedE	2006	2	0	R	Northwest
								CrReedE	2007	2	1.553	R	Northwest
								CrReedE	2008	2	1.553	R	Northwest
								CrReedE	2009	2	4.143	R	Northwest
								CrReedE	2010	2	23.08	R	Northwest
								CrReedE	2011	2	21.749	R	Northwest
								CrReedE	2012	2	9.321	R	Northwest
								CrReedE	2013	2	3.107	R	Northwest
								CrReedE	2014	2	0	R	Northwest
								Crcorner	1991	2	0	R	Northwest
								Crcorner	1992	2	5.326	R	Northwest
								Crcorner	1993	2	1.775	R	Northwest
								Crcorner	1994	2	10.356	R	Northwest
								Crcorner	1995	2	22.37	R	Northwest
								Crcorner	1996	2	6.779	R	Northwest
								Crcorner	1997	2	15.817	R	Northwest
								Crcorner	1998	2	26.631	R	Northwest
								Crcorner	1999	2	4.143	R	Northwest
								Crcorner	2000	2	16.57	R	Northwest
								Crcorner	2001	2	21.541	R	Northwest
								Crcorner	2002	2	7.102	R	Northwest
								Crcorner	2003	2	19.529	R	Northwest
								Crcorner	2004	2	3.551	R	Northwest
								Crcorner	2005	2	14.203	R	Northwest
								Crcorner	2006	2	9.321	R	Northwest
								Crcorner	2007	2	12.428	R	Northwest
								Crcorner	2008	2	19.884	R	Northwest
								Crcorner	2009	2	4.66	R	Northwest
								Crcorner	2010	2	46.604	R	Northwest
								Crcorner	2011	2	55.925	R	Northwest
								Crcorner	2012	2	37.283	R	Northwest
								Crcorner	2013	2	10.874	R	Northwest
								Crcorner	2014	2	1.553	R	Northwest
								Croverne	1991	2	2.071	R	Northwest
								Croverne	1992	2	8.285	R	Northwest
								Croverne	1993	2	0	R	Northwest
								Croverne	1994	2	7.102	R	Northwest
								Croverne	1995	2	31.069	R	Northwest
								Croverne	1997	2	0	R	Northwest
								Croverne	1998	2	3.551	R	Northwest
								Croverne	1999	2	12.428	R	Northwest
								Croverne	2000	2	6.214	R	Northwest
								Croverne	2001	2	56.813	R	Northwest
								Croverne	2002	2	2.762	R	Northwest
								Croverne	2003	2	4.971	R	Northwest
								Croverne	2004	2	0	R	Northwest
								Croverne	2005	2	0	R	Northwest
								Croverne	2006	2	0	R	Northwest
								Croverne	2007	2	0	R	Northwest
								Croverne	2008	2	0	R	Northwest
								Croverne	2009	2	0	R	Northwest
								Croverne	2010	2	0	R	Northwest
								Croverne	2011	2	0	R	Northwest
								Croverne	2012	2	0	R	Northwest
								Croverne	2013	2	0	R	Northwest
								Croverne	2014	2	0	R	Northwest
								Crovernw	1991	2	0	R	Northwest
								Crovernw	1992	2	12.428	R	Northwest
								Crovernw	1993	2	0	R	Northwest
								Crovernw	1994	2	31.069	R	Northwest
								Crovernw	1995	2	24.856	R	Northwest
								Crovernw	1997	2	0	R	Northwest
								Crovernw	1998	2	4.143	R	Northwest
								Crovernw	1999	2	0	R	Northwest
								Crovernw	2000	2	3.551	R	Northwest
								Crovernw	2001	2	17.754	R	Northwest
								Crovernw	2002	2	0	R	Northwest
								Crovernw	2003	2	6.214	R	Northwest
								Crovernw	2004	2	0	R	Northwest
								Crovernw	2005	2	0	R	Northwest
								Crovernw	2006	2	0	R	Northwest
								Crovernw	2007	2	0	R	Northwest
								Crovernw	2008	2	0	R	Northwest
								Crovernw	2009	2	0	R	Northwest
								Crovernw	2010	2	2.486	R	Northwest
								Crovernw	2011	2	7.457	R	Northwest
								Crovernw	2012	2	4.971	R	Northwest
								Crovernw	2013	2	0	R	Northwest
								Crovernw	2014	2	0	R	Northwest
								Croverse	1991	2	0	R	Northwest
								Croverse	1992	2	9.942	R	Northwest
								Croverse	1993	2	0	R	Northwest
								Croverse	1994	2	0	R	Northwest
								Croverse	1995	2	0	R	Northwest
								Croverse	1997	2	0	R	Northwest
								Croverse	1998	2	0	R	Northwest
								Croverse	1999	2	0	R	Northwest
								Croverse	2000	2	0	R	Northwest
								Croverse	2001	2	10.652	R	Northwest
								Croverse	2002	2	2.762	R	Northwest
								Croverse	2003	2	0	R	Northwest
								Croverse	2004	2	0	R	Northwest
								Croverse	2005	2	0	R	Northwest
								Croverse	2006	2	0	R	Northwest
								Croverse	2007	2	0	R	Northwest
								Croverse	2008	2	0	R	Northwest
								Croverse	2009	2	0	R	Northwest
								Croverse	2010	2	0	R	Northwest
								Croverse	2011	2	3.107	R	Northwest
								Croverse	2012	2	0	R	Northwest
								Croverse	2013	2	0	R	Northwest
								Croverse	2014	2	0	R	Northwest
								Croversw	1991	2	4.143	R	Northwest
								Croversw	1992	2	7.767	R	Northwest
								Croversw	1993	2	2.071	R	Northwest
								Croversw	1994	2	9.038	R	Northwest
								Croversw	1995	2	9.321	R	Northwest
								Croversw	1996	2	5.523	R	Northwest
								Croversw	1997	2	6.779	R	Northwest
								Croversw	1998	2	8.285	R	Northwest
								Croversw	1999	2	4.971	R	Northwest
								Croversw	2000	2	19.884	R	Northwest
								Croversw	2001	2	16.57	R	Northwest
								Croversw	2002	2	6.779	R	Northwest
								Croversw	2003	2	4.143	R	Northwest
								Croversw	2004	2	0	R	Northwest
								Croversw	2005	2	10.356	R	Northwest
								Croversw	2006	2	0	R	Northwest
								Croversw	2007	2	0	R	Northwest
								Croversw	2008	2	0	R	Northwest
								Croversw	2009	2	0	R	Northwest
								Croversw	2010	2	3.551	R	Northwest
								Croversw	2011	2	16.57	R	Northwest
								Croversw	2012	2	1.657	R	Northwest
								Croversw	2013	2	4.66	R	Northwest
								Croversw	2014	2	1.775	R	Northwest
